# Supplementary material for: Core–shell-like structured graphene aerogel encapsulating paraffin: shape-stable phase change material for thermal energy storage
Source: Royal Society of Chemistry journal article supplement (doi:10.1039/c4ta05448b), 2014-12-06
Supplement: c4ta05448b1.pdf [file c4ta05448b1.pdf]

*Supplementary Information for*

## Core-shell-like structured graphene aerogel encapsulating paraffin: Shape-stable phase change material for thermal energy storage

Shibing Ye, Qinglong Zhang, Dingding Hu, and Jiachun Feng\*

State Key Laboratory of Molecular Engineering of Polymers, Department of Macromolecular Science and Laboratory of Advanced Materials, Fudan University, Shanghai 200433, China.

\*Corresponding author, E-mail: [jcfeng@fudan.edu.cn](mailto:jcfeng@fudan.edu.cn); Tel: +86 21 6564 3735

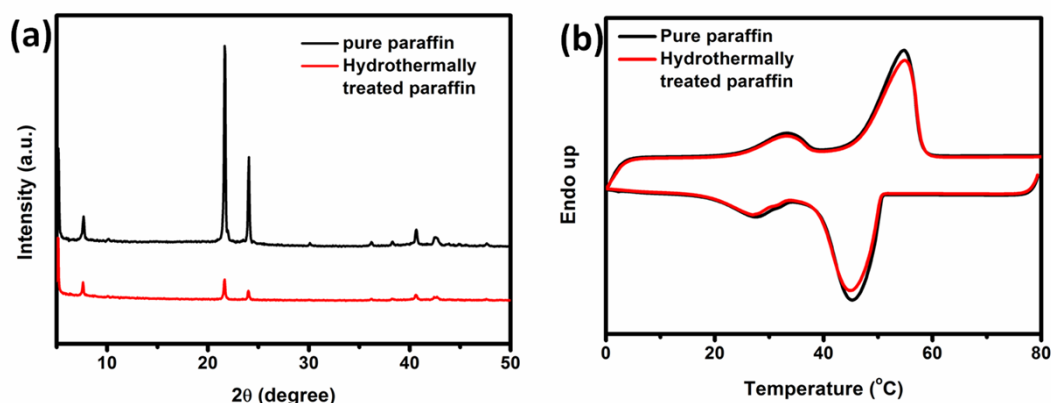

**Fig. S1** (a) XRD patterns and (b) DSC curves of pure paraffin and the hydrothermally treated paraffin. The almost identical curves suggest that paraffin used in this work is thermally stable during the modified hydrothermal process.

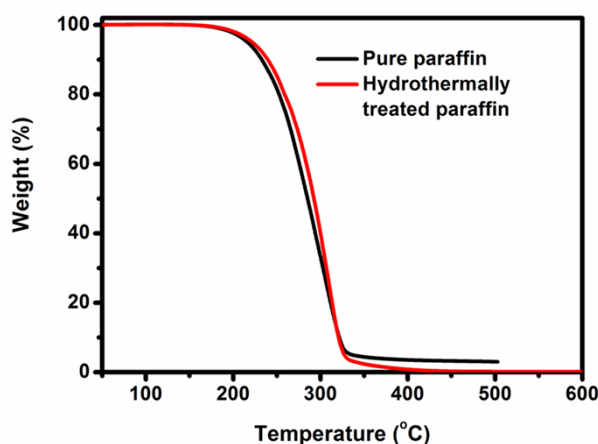

**Fig. S2** TGA curves of pure paraffin and the hydrothermally treated paraffin.

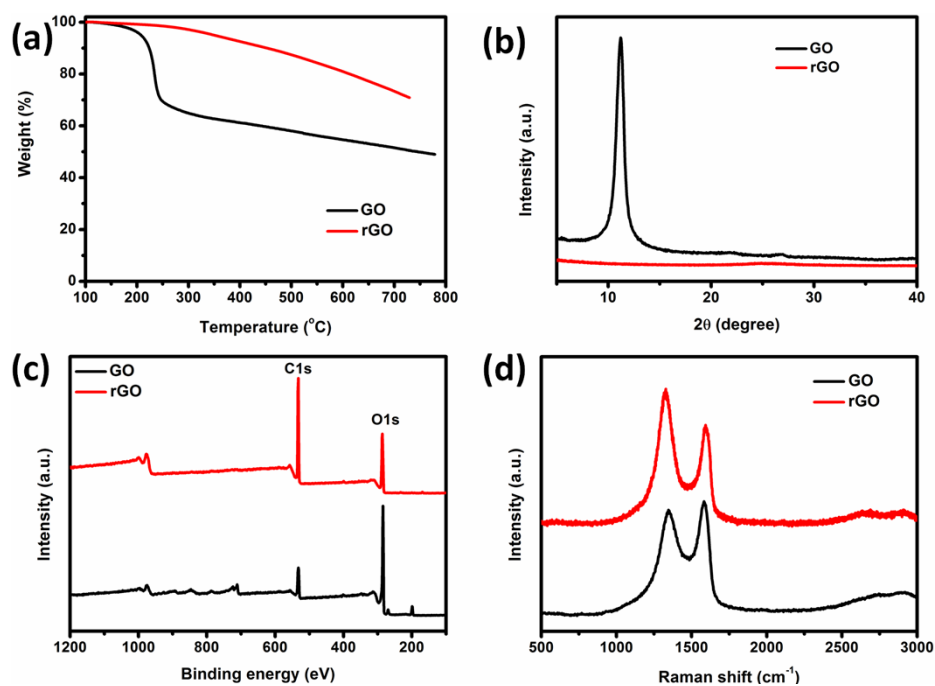

**Fig. S3** (a) TGA curves, (b) XRD patterns, (c) XPS survey spectra, and (d) Raman spectra of the raw GO and the rGO isolated from the MH-GPn.

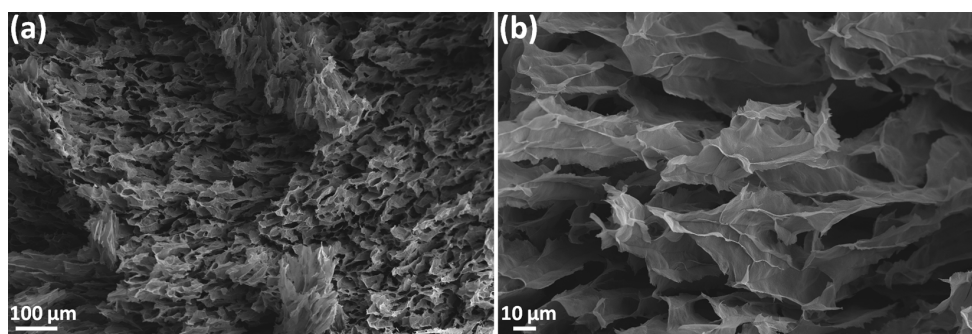

**Fig. S4** SEM images of H-GA prepared by traditional hydrothermal method at different magnifications.

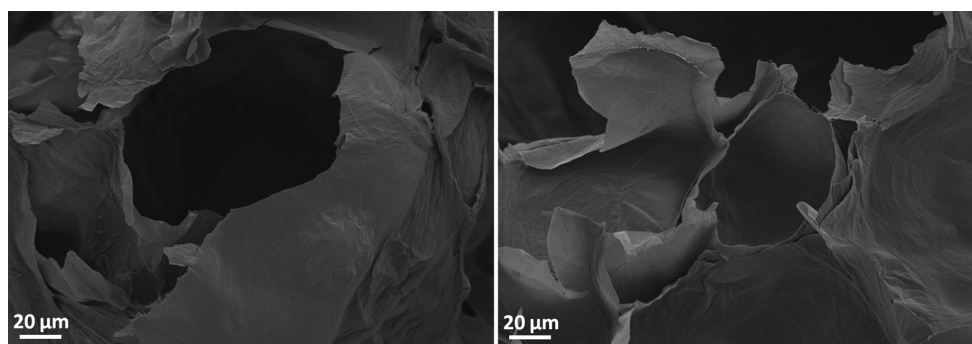

**Fig. S5** SEM images of the graphene shells in MH-GP200 in which the paraffin has been removed by repeatedly washing with cyclohexane.

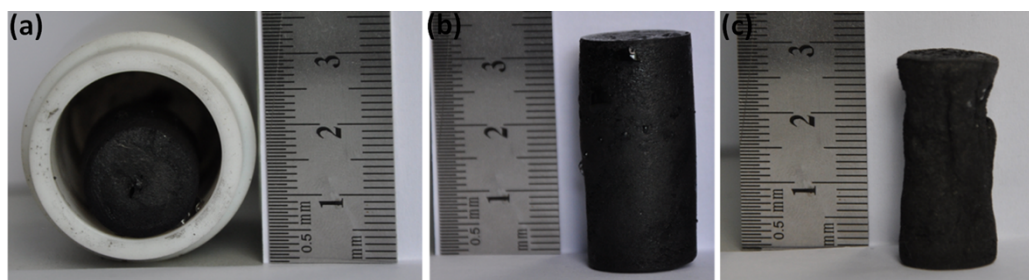

**Fig. S6** Photographs of the formation process of a representative sample MH-GP50. (a) the gel in the reactor, (b) the gel out of the reactor, and (c) the aerogel after removing the organic solvent and freezing drying.

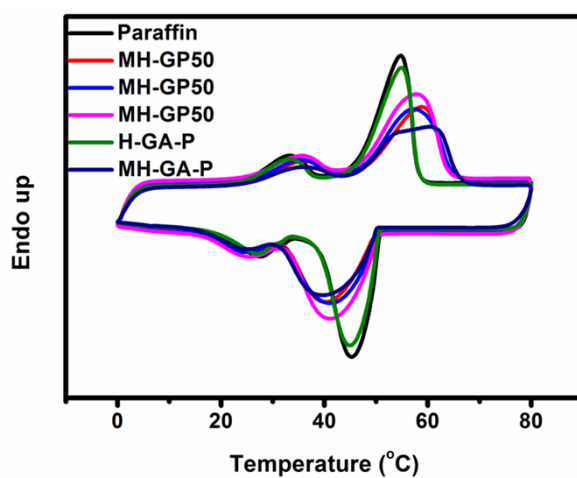

**Fig. S7** DSC curves of melting and freezing of different PCMs.
